# Supplementary material for: Graft versus Host Disease in the Bone Marrow, Liver and Thymus Humanized Mouse Model
Source: PLoS One. 2012 Sep 5;7(9):e44664. doi: 10.1371/journal.pone.0044664 (PMC3434179; doi:10.1371/journal.pone.0044664)

Supplemental Information for

## Graft Versus Host Disease in Mice Bearing Humanized Immune Systems

Matthew B. Greenblatt<sup>1</sup>, Vladimir Vbranac<sup>2,3</sup>, Trevor Tivey<sup>2,3</sup>,  
Kelly Tsang<sup>1</sup>, Andrew M. Tager<sup>2,3</sup>, Antonios O. Aliprantis<sup>1,4</sup>

<sup>1</sup> Department of Immunology and Infectious Diseases, Harvard School of Public Health, Boston, Massachusetts. <sup>2</sup> Center for Immunology and Inflammatory Diseases, Division of Rheumatology, Allergy and Immunology, Massachusetts General Hospital, Harvard Medical School, Charlestown, Massachusetts 02129; <sup>3</sup> Ragon Institute of MGH, MIT, and Harvard and Division of AIDS, Harvard Medical School, Charlestown, Massachusetts 02129; <sup>4</sup> Department of Medicine, Division of Rheumatology, Allergy and Immunology, Brigham and Women's Hospital and Harvard Medical School, Boston, Massachusetts, USA;

Address correspondence to: Antonios O. Aliprantis, Harvard School of Public Health, 651 Huntington Avenue, FXB 205, Boston, Massachusetts 02115, USA. Phone: 617.432.4867; Fax: 617.432.0084; E-mail: [aaliprantis@partners.org](mailto:aaliprantis@partners.org).

**Supplemental Table 1: P values and relative risk for the influence of HLA class I alleles on GVH incidence**

Relative risk and significance for various HLA class I alleles was calculated in Figure 2. Displayed are the relative risk values, 95% confidence intervals, and P values for each HLA allele.

| HLA Allele | Relative Risk | 95% CI lower bound | 95% CI upper bound | P Value | P Value Corrected for Multiple Comparisons |
|------------|---------------|--------------------|--------------------|---------|--------------------------------------------|
| A1101      | 2.062         | 1.704              | 2.495              | <0.0001 | <.0012                                     |
| A2402      | 2.005         | 1.622              | 2.478              | <0.0001 | <.0012                                     |
| A3303      | 1.777         | 1.34               | 2.357              | 0.0004  | 0.0048                                     |
| A201       | 1.376         | 1.184              | 1.598              | <0.0001 | <.0012                                     |
| A206       | 1.297         | 0.8856             | 1.899              | ns      | ns                                         |
| A207       | 1.26          | 0.8592             | 1.849              | ns      | ns                                         |
| A301       | 1.257         | 1.043              | 1.517              | ns      | ns                                         |
| A2601      | 1.2           | 0.8804             | 1.636              | ns      | ns                                         |
| A6801      | 0.9829        | 0.6606             | 1.463              | ns      | ns                                         |
| A101       | 0.9078        | 0.7323             | 1.125              | ns      | ns                                         |
| A6802      | 0.5946        | 0.3624             | 0.9755             | 0.0287  | 0.3444                                     |
| A3201      | 0.06465       | 0.009216           | 0.4535             | <0.0001 | <.0012                                     |

| HLA Allele | Relative Risk | 95% CI lower bound | 95% CI upper bound | P Value | P Value Corrected for Multiple Comparisons |
|------------|---------------|--------------------|--------------------|---------|--------------------------------------------|
| B1302      | 3.461         | 2.939              | 4.076              | <0.0001 | <.0012                                     |
| B3502      | 2.74          | 2.187              | 3.432              | <0.0001 | <.0012                                     |
| B4601      | 1.26          | 0.8592             | 1.849              | ns      | ns                                         |
| B4001      | 1.204         | 0.9326             | 1.554              | ns      | ns                                         |
| B3801      | 1.2           | 0.8804             | 1.636              | ns      | ns                                         |
| B3501      | 0.9085        | 0.7137             | 1.157              | ns      | ns                                         |
| B5101      | 0.8678        | 0.6798             | 1.108              | ns      | ns                                         |
| B4403      | 0.8313        | 0.6142             | 1.125              | ns      | ns                                         |
| B702       | 0.6919        | 0.5068             | 0.9446             | ns      | ns                                         |
| B1510      | 0.5946        | 0.3624             | 0.9755             | 0.0387  | 0.4644                                     |
| B801       | 0.4887        | 0.3371             | 0.7084             | <0.0001 | <.0012                                     |
| B1401      | 0.06465       | 0.009216           | 0.4535             | <0.0001 | <.0012                                     |

| HLA Allele | Relative Risk | 95% CI lower bound | 95% CI upper bound | P Value | P Value Corrected for Multiple Comparisons |
|------------|---------------|--------------------|--------------------|---------|--------------------------------------------|
|------------|---------------|--------------------|--------------------|---------|--------------------------------------------|

|       |        |        |       |         |        |
|-------|--------|--------|-------|---------|--------|
| C602  | 1.995  | 1.686  | 2.359 | <0.0001 | <.0009 |
| C401  | 1.49   | 1.271  | 1.745 | <0.0001 | <.0009 |
| C304  | 1.242  | 1.038  | 1.486 | 0.0238  | 0.2142 |
| C102  | 1.221  | 0.8964 | 1.663 | ns      | ns     |
| C1203 | 1.182  | 0.8957 | 1.559 | ns      | ns     |
| C802  | 0.9427 | 0.626  | 1.419 | ns      | ns     |
| C202  | 0.8372 | 0.5896 | 1.189 | ns      | ns     |
| C702  | 0.7906 | 0.5953 | 1.05  | ns      | ns     |
| C701  | 0.7383 | 0.5843 | 0.933 | 0.0108  | 0.0972 |

## **Supplemental Figure Legends**

### **Supplemental Figure 1. Further histologic characterization of GVH occurring in humanized BLT mice.**

(A-D) Tissues from humanized BLT mice with clinical GVH as in Figure 1 were harvested for histologic analysis.

### **Supplemental Figure 2. Cellular and molecular characterization of GVH in BLT mice.**

Splenocytes were isolated and stimulated as in Figure 3E, and the resulting supernatant was analyzed for levels of IL10.

### **Supplemental Figure 3: Replicate Data for Dermal Macrophage Expression Profile**

Macrophages were isolated as in Figure 4, RNA extracted, and expression of the indicated genes measured by realtime PCR. Shown are independent experimental replicates of the data provided in Figure 4B.

A

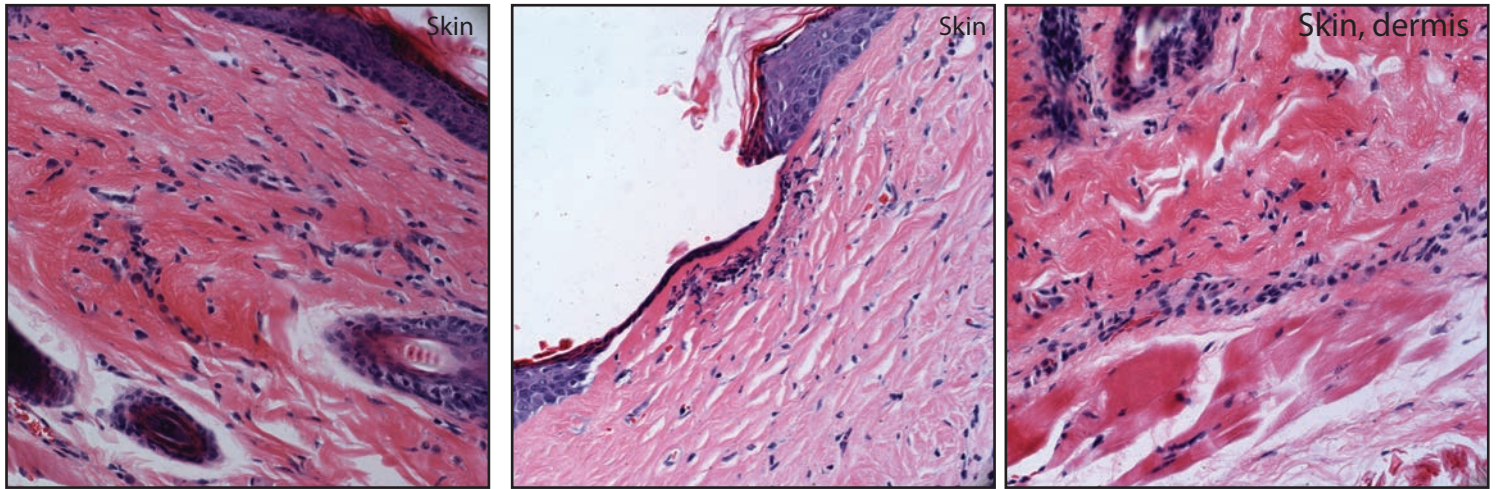

B

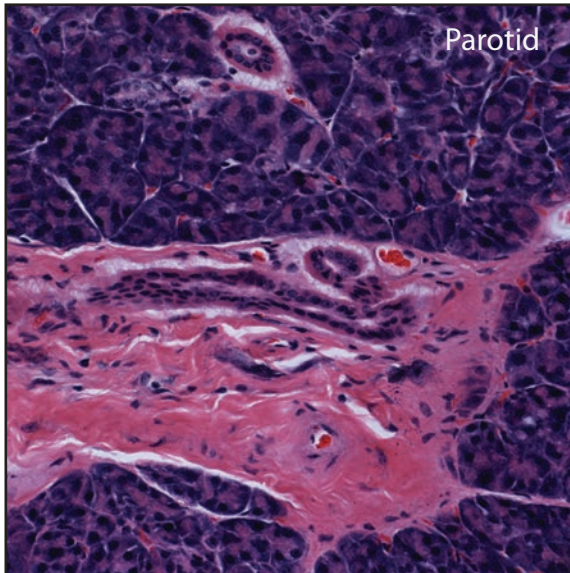

C

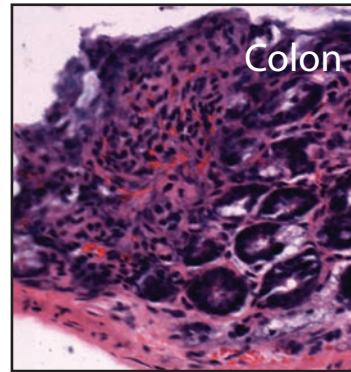

D

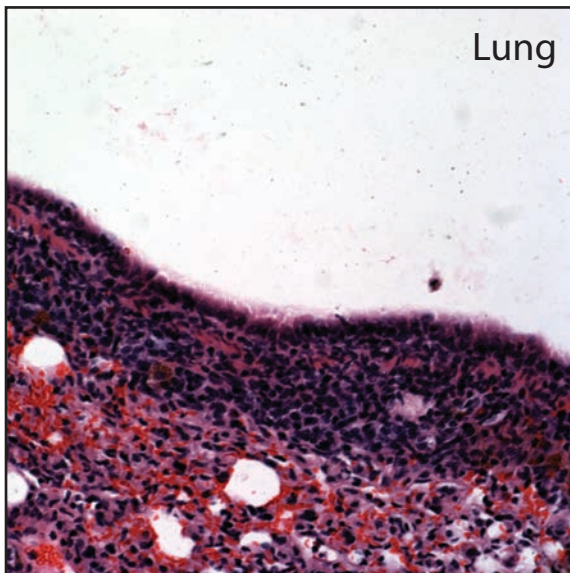

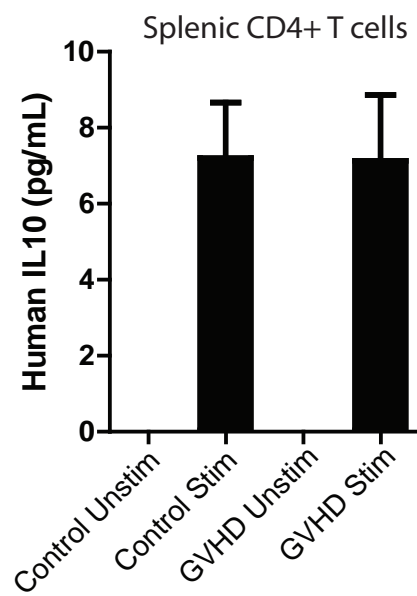

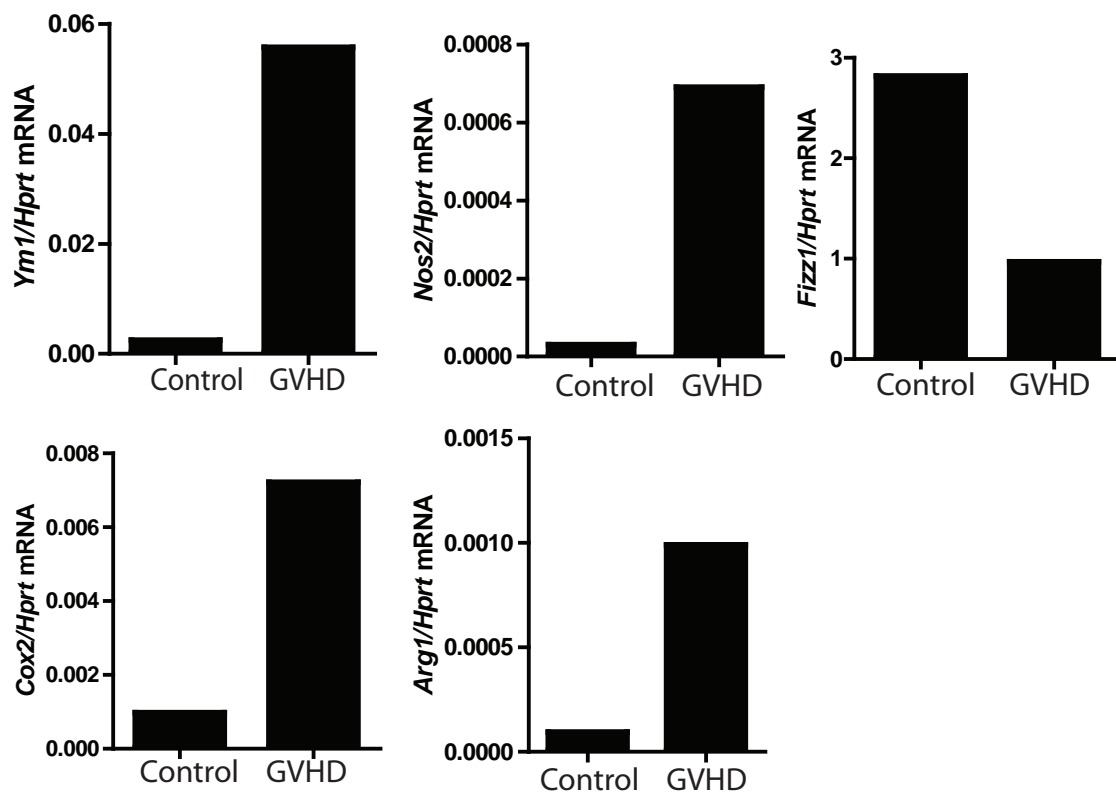

Supplement: Information S1 — Table 1, Figures 1 – 3 . Table 1: P values and relative risk for the influence of HLA class I alleles on GVH incidence. Relative risk and significance for various HLA class I alleles was calculated in Figure 2. Displayed are the relative risk values, 95% confidence intervals, and P values for each HLA allele. Figure 1. Further histologic characterization of GVH occurring in humanized BLT mice. (A–D)Tissues from humanized BLT mice with clinical GVH as in Figure 1 were harvested for histologic analysis. Figure 2. Cellular and molecular characterization of GVH in BLT mice. Splenocytes were isolated and stimulated as in Figure 3E, and the resulting supernatant was analyzed for levels of IL10. Figure 3: Replicate Data for Dermal Macrophage Expression Profile. Macrophages were isolated as in Figure 4, RNA extracted, and expression of the indicated genes measured by realtime PCR. Shown are independent experimental replicates of the data provided in Figure 4B. (PDF) [file pone.0044664.s001.pdf]
